# Supplementary material for: Evaluating the Growth of Ceria-Modified N-Doped Carbon-Based Materials and Their Performance in the Oxygen Reduction Reaction
Source: MDPI journal article supplement (doi:10.3390/nano12173057), 2022-09-02
Supplement: s1 [file s1]

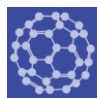

## Article

# Evaluating the Growth of Ceria-Modified N-Doped Carbon-Based Materials and Their Performance in the Oxygen Reduction Reaction

Xin Wen, Ying Chang \* and Jingchun Jia

Inner Mongolia Key Laboratory of Green Catalysis and Inner Mongolia Collaborative Innovation Center for Water Environment Safety, College of Chemistry and Environmental Science, Inner Mongolia Normal University, Hohhot 010022, China

\* Correspondence: changying@imnu.edu.cn

## Experimental Details

### S1. Test Details

**Slurry preparation:** 5 mg catalyst is dissolved in 1 mL nafion solution. The Nafion solution is prepared according to the ratio of nafion: ultrapure water: ethanol = 1:9:10. It is ultrasonicated for 30 minutes for standby. It is put into the refrigerator in time after use. It is ultrasonicated for at least 30 minutes before the next use.

**Electrochemical test:** Commercial Pt/C slurry drops 8  $\mu\text{L}$  at one time on the surface of rotating disk electrode or rotating ring disk electrode with a pipette gun. The remaining catalyst slurry is evenly dropped on the electrode surface twice with a pipette gun, with a total of 16  $\mu\text{L}$ . They were naturally evaporated at room temperature and used as working electrode, carbon rod as counter electrode and Hg/HgO as reference electrode to form a three-electrode system for ORR electrochemical test. The test was carried out using AutoLab electrochemical workstation (Metrohm, Switzerland) in constant temperature 25  $^{\circ}\text{C}$ , 0.1 M KOH solution and  $\text{O}_2$  or Ar saturated atmosphere. In the test system, the glassy carbon electrode (diameter is 5 mm) coated with catalyst slurry is selected as the working electrode, the carbon rod (diameter is 5 mm) is used as the counter electrode, and the saturated calomel electrode is used as the reference electrode.

**Methanol Tolerance Test:** Methanol is added at a concentration of 1 M.

**Zn-Air battery test:** A total of 200  $\mu\text{L}$  of catalyst slurry were added to the carbon paper-foam nickel composite matrix ( $1 \times 1 \text{ cm}^2$ ) four times, and then dried under the light as an air cathode; the polished Zn sheet is used as a metal anode; The electrolyte is a mixed solution of 6 M KOH and 0.2 M  $\text{Zn}(\text{Ac})_2$ . CHI760E electrochemical workstation (Shanghai Chenhua Co., Ltd.) is used to test the charge discharge curve and EIS (Frequency range: 0.01–100,000 Hz, Init E: 1.35 V) of the battery and calculate the power density; CT2001A blue electric test system (Wuhan Blue Electric Electronics Co., Ltd.) was used to test the performance of self-made Zn-Air battery.

### S2. Calculation of Transfer Electron Number and $\text{H}_2\text{O}_2$ Yield

#### K-L Curve Fitting:

The K-L (Koutecky-Levich) equation is used to fit the LSV curve obtained by electrochemical test, so as to obtain the electron transfer number in the reaction process. The equation is as follows:

$$\frac{1}{j} = \frac{1}{j_k} + \frac{1}{j_d} = \frac{1}{nFkC_{O_2}} + \frac{1}{0.20nFC_{O_2}D_{O_2}\frac{2}{3}\nu^{-\frac{1}{6}}\omega^{\frac{1}{2}}} \quad (S1)$$

The total current density  $j$  includes the kinetic current density  $j_k$  and the limit diffusion current density  $j_d$ .  $n$  represents the total number of electrons transferred by each oxygen molecule,  $F$  is the Faraday constant,  $k$  is the reaction rate constant,  $C_{O_2}$  is the volume concentration of  $O_2$ ,  $D_{O_2}$  is the diffusion coefficient of  $O_2$ ,  $\nu$  represents the kinetic viscosity and  $\omega$  represents the angular velocity of the disk.

Calculation of RRDE Results:

$H_2O_2$  yield:

$$H_2O_2 \% = 200 \times \frac{\frac{I_R}{N}}{\frac{I_R}{N} + I_D} \quad (S2)$$

Electron transfer number :

$$n = 4 \times \frac{I_D}{I_D + \frac{I_R}{N}} \quad (S3)$$

Where  $I_R$  represents the ring current,  $I_D$  represents the disk current, and  $N$  is the current collection efficiency of Pt ring electrode.

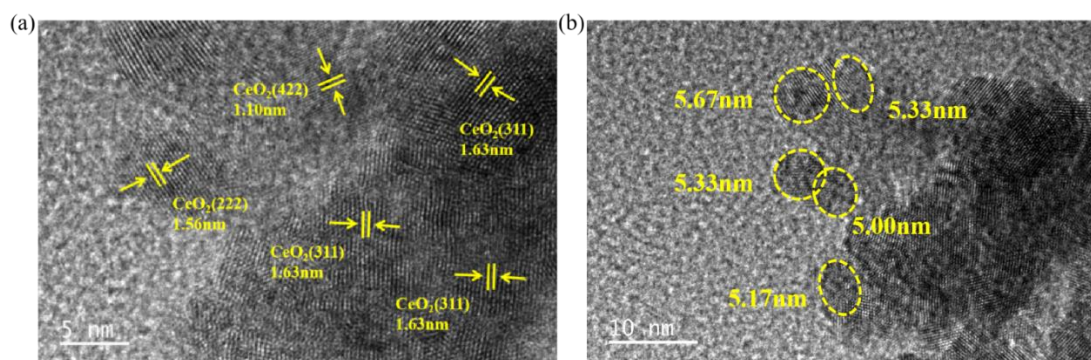

**Figure S1.** (a), (b) TEM diagrams of  $CeO_2$ -CN-800.

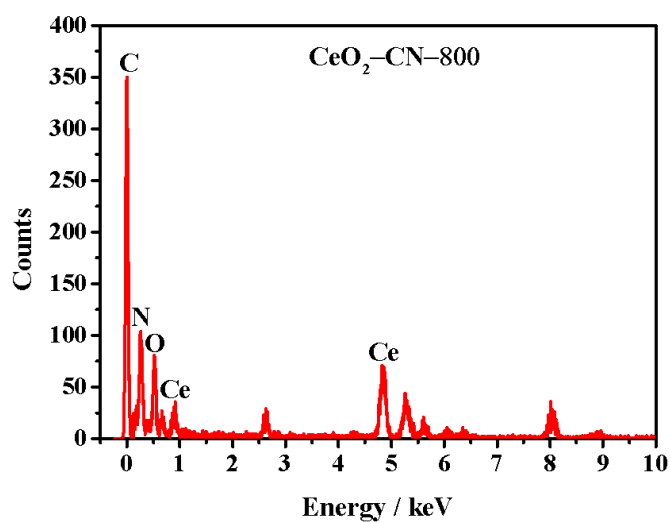

Figure S2. EDS diagram of CeO<sub>2</sub>-CN-800.

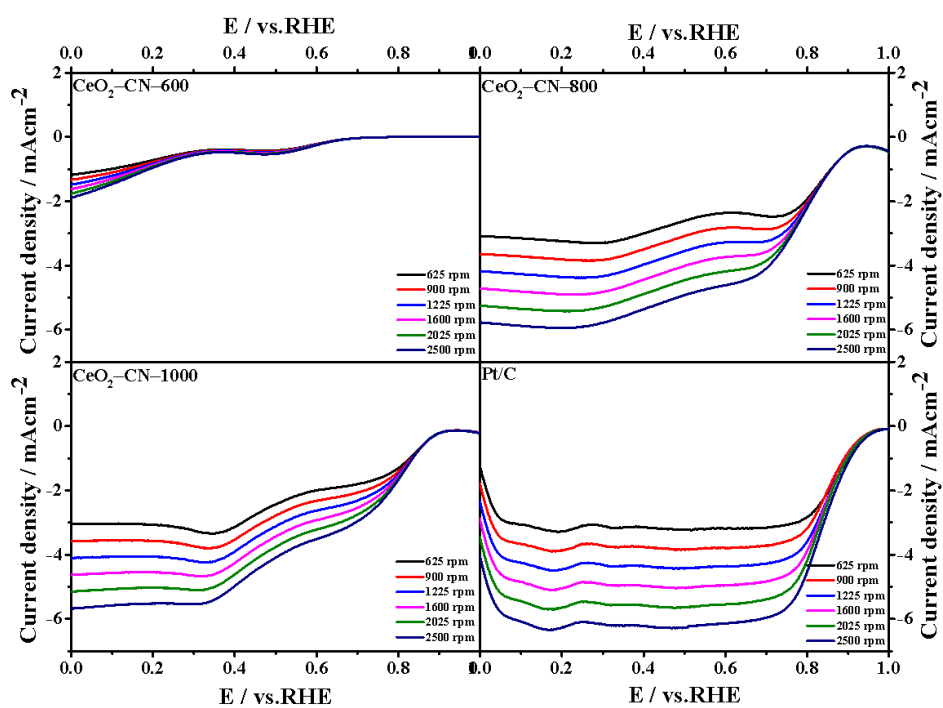

Figure S3. LSV curves of CeO<sub>2</sub>-CN-600, CeO<sub>2</sub>-CN-800, CeO<sub>2</sub>-CN-1000 and Pt/C.

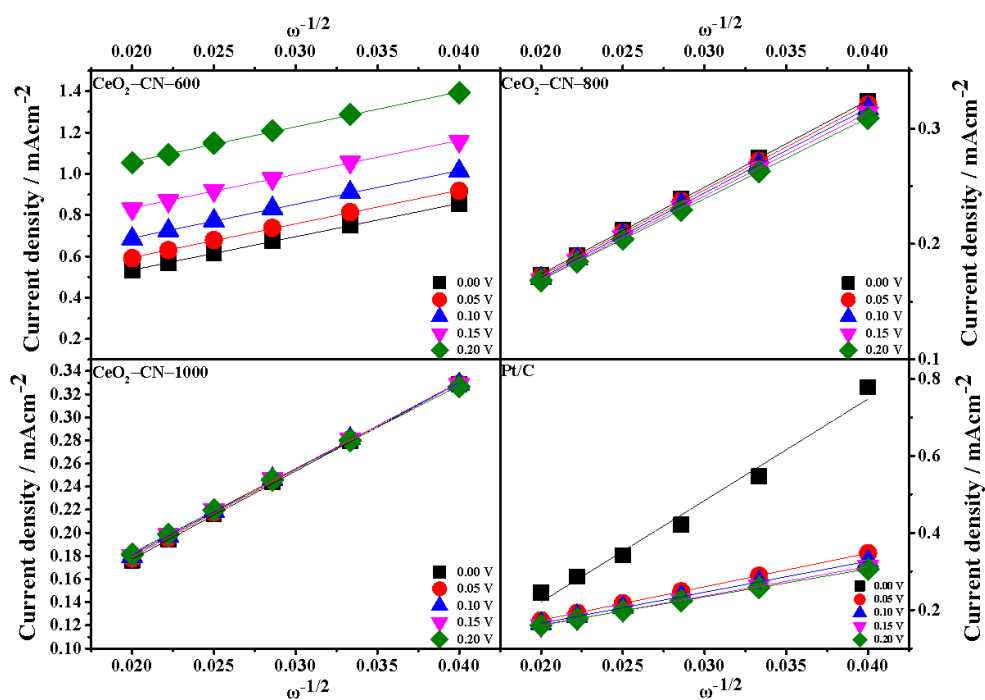

Figure S4. K-L curves of CeO<sub>2</sub>-CN-600, CeO<sub>2</sub>-CN-800, CeO<sub>2</sub>-CN-1000 and Pt/C.

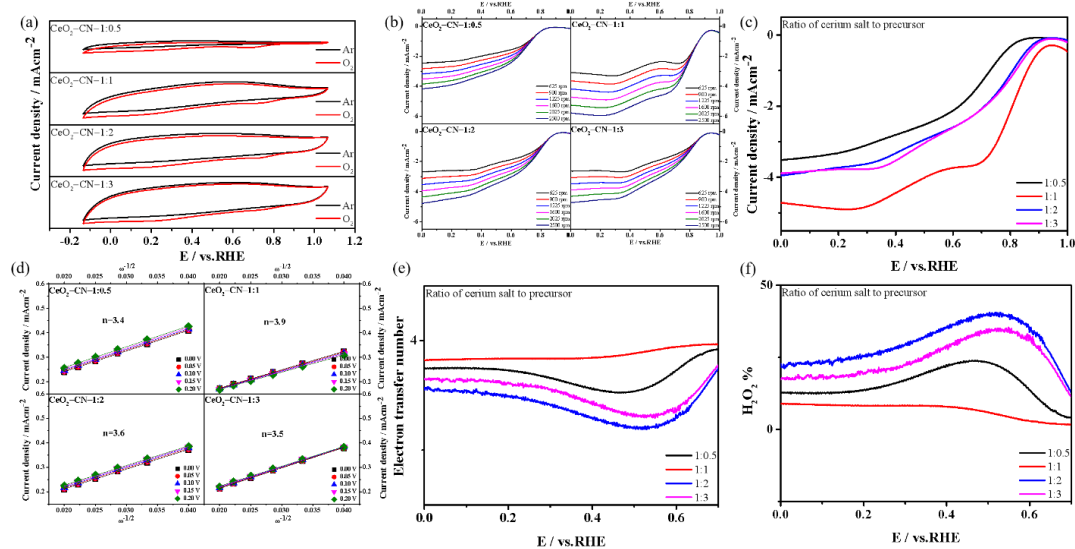

Figure S5. (a) CV diagrams, (b) LSV diagrams, (c) LSV curves comparison diagram, (d) K-L curves, (e) Electron transfer number, and (f) Hydrogen peroxide yield of different ratios of cerium salt to precursor.

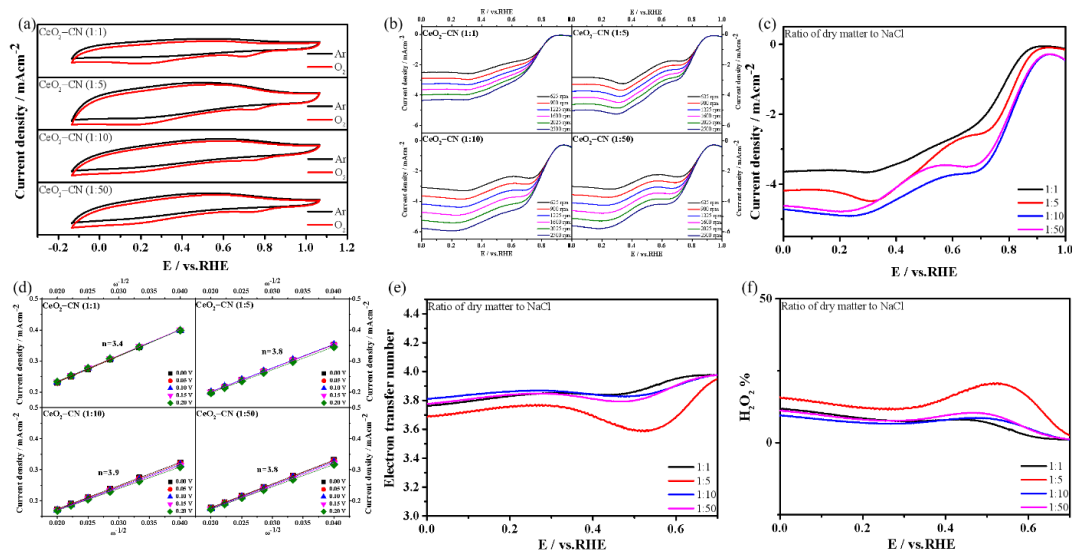

**Figure S6.** (a) CV diagrams, (b) LSV diagrams, (c) LSV curves comparison diagram, (d) K-L curves, (e) Electron transfer number, and (f) Hydrogen peroxide yield of different ratios of dry matter to NaCl.

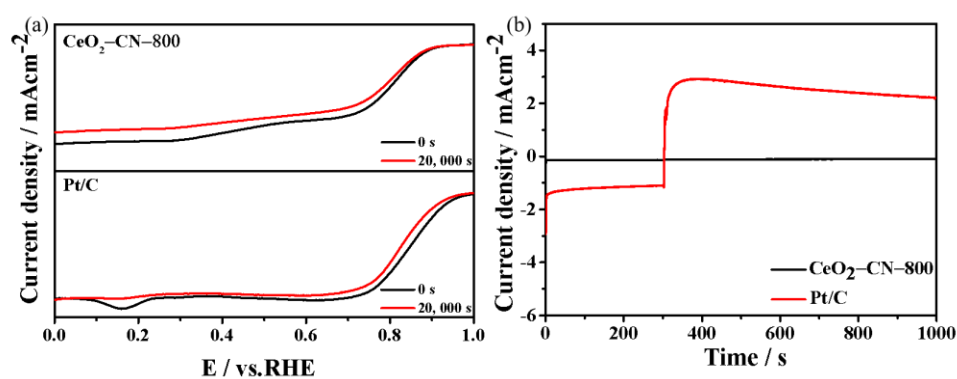

**Figure S7.** (a) LSV diagrams before and after i-t stability test, (b) i-t curves before and after adding methanol of CeO<sub>2</sub>-CN-800 and Pt/C.

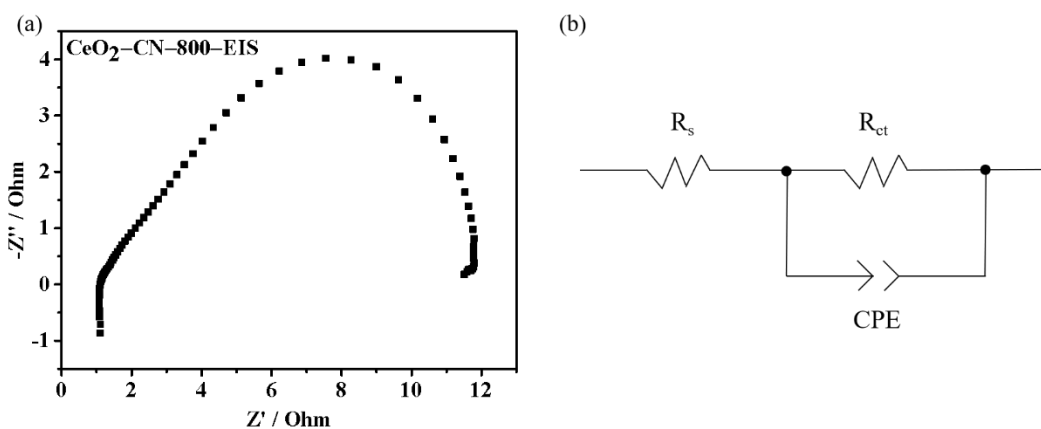

**Figure S8.** (a) Electrochemical impedance spectrogram and (b) its equivalent circuit diagram of CeO<sub>2</sub>-CN-800 in zinc-air battery.

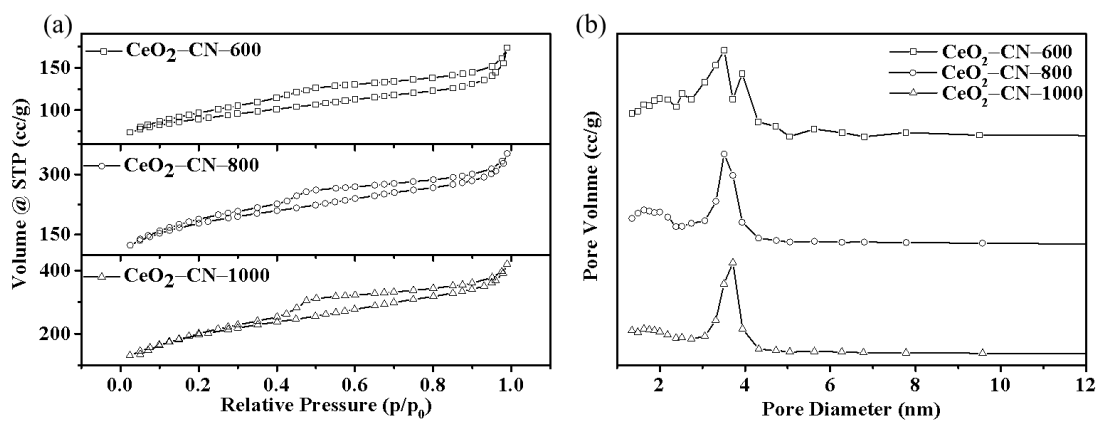

**Figure S9.** (a) Nitrogen adsorption-desorption isotherm, (b) pore size distribution curve of CeO<sub>2</sub>-CN-600, CeO<sub>2</sub>-CN-800, CeO<sub>2</sub>-CN-1000.

**Table S1.** Summary of some recently reported CeO<sub>2</sub> based electrocatalysts in alkaline electrolyte.

| Catalyst.                                              | E <sub>0</sub> (V vs.RHE) | E <sub>1/2</sub> (V vs.RHE) | Reference |
|--------------------------------------------------------|---------------------------|-----------------------------|-----------|
| Co <sub>3</sub> O <sub>4</sub> -CeO <sub>2</sub> /KB   | -                         | 0.83                        | [1]       |
| CeO <sub>2</sub> @N-C-900                              | 1.00                      | 0.90                        | [2]       |
| CeO <sub>2</sub> hollow spheres                        | 0.84                      | 0.76                        | [3]       |
| NiCo <sub>2</sub> O <sub>4</sub> /CeO <sub>2</sub>     | 0.84                      | 0.69                        | [4]       |
| Pd-CeO <sub>2</sub> -NR/C                              | 0.97                      | 0.87                        | [5]       |
| 4.8% Ce-MnO <sub>2</sub> /C                            | 0.87                      | 0.78                        | [6]       |
| CeO <sub>2</sub> @NC-900                               | 0.90                      | 0.85                        | [7]       |
| 0.5 Co-NC-CeO <sub>2</sub>                             | 0.87                      | 0.81                        | [8]       |
| Pd <sub>3</sub> Ag <sub>1</sub> /meso-CeO <sub>2</sub> | 0.97                      | 0.86                        | [9]       |
| CeO <sub>2</sub> /VC (80 wt%)                          | 0.76                      | 0.63                        | [10]      |
| CeO <sub>2</sub> /MnWO <sub>4</sub> -2                 | -                         | 0.60                        | [11]      |
| CeO <sub>2</sub> -CN-800                               | 0.90                      | 0.84                        | This work |

**Table S2.** Calculation of average crystallite size from XRD results using Scherrer formula.

| 2 Theta  | FWHM     | Crystallite Size D (nm) | Average D (nm) |
|----------|----------|-------------------------|----------------|
| 28.37892 | 1.45384  | 5.64                    | 5.21           |
| 32.86566 | 1.48689  | 5.57                    |                |
| 47.19659 | 1.42589  | 6.08                    |                |
| 56.07876 | 1.58726  | 5.67                    |                |
| 76.45285 | 71.70431 | 0.14                    |                |
| 76.45285 | 1.64782  | 6.14                    |                |
| 78.67725 | 1.42167  | 7.23                    |                |

**Table S3.** BET surface area, pore volume and pore size of CeO<sub>2</sub>-CN-600, CeO<sub>2</sub>-CN-800, CeO<sub>2</sub>-CN-1000.

| Sample                    | BET surface area (m <sup>2</sup> /g) | Pore volume (cc/g) | Pore size (nm) |
|---------------------------|--------------------------------------|--------------------|----------------|
| Ce <sub>2</sub> O-CN-600  | 291.1                                | 0.27               | 3.69           |
| Ce <sub>2</sub> O-CN-800  | 607.6                                | 0.54               | 3.58           |
| Ce <sub>2</sub> O-CN-1000 | 683.9                                | 0.65               | 3.81           |

**Table S4.** Elemental analysis results of Ce<sub>2</sub>O-CN-800.

|                          | C (wt %) | N (wt %) | O (wt %) | Ce (wt %) |
|--------------------------|----------|----------|----------|-----------|
| Ce <sub>2</sub> O-CN-800 | 63.15    | 3.96     | 23.45    | 9.43      |

**Table S5.** Deconvolution results of N 1s XPS spectra of CeO<sub>2</sub>-CN-600, CeO<sub>2</sub>-CN-800, CeO<sub>2</sub>-CN-1000.

| Sample                    | pyridinic-N (rel. %) | pyrrolic-N (rel. %) | graphitic-N (rel. %) |
|---------------------------|----------------------|---------------------|----------------------|
| Ce <sub>2</sub> O-CN-600  | 76.59                | 23.41               | 0                    |
| Ce <sub>2</sub> O-CN-800  | 86.20                | 11.17               | 2.63                 |
| Ce <sub>2</sub> O-CN-1000 | 28.67                | 71.33               | 0                    |

## References

- Liu, K.; Huang, X.; Wang, H.; Li, F.; Tang, Y.; Li, J.; Shao, M., Co<sub>3</sub>O<sub>4</sub>-CeO<sub>2</sub>/C as a highly active electrocatalyst for oxygen reduction reaction in Al-air batteries. *ACS Applied Materials & Interfaces* **2016**, *8* (50), 34422–34430.
- Yu, Y.; Gao, L.; Liu, X.; Wang, Y.; Xing, S., Enhancing the catalytic activity of zeolitic imidazolate framework-8-derived N-doped carbon with incorporated CeO<sub>2</sub> nanoparticles in the oxygen reduction reaction. *Chemistry* **2017**, *23* (44), 10690–10697.
- Ghosh, D.; Parwaiz, S.; Mohanty, P.; Pradhan, D., Tuning the morphology of CeO<sub>2</sub> nanostructures using a template-free solvothermal process and their oxygen reduction reaction activity. *Dalton Trans.* **2020**, *49* (48), 17594–17604.
- Wang, J.; Dong, X.; Yang, J.; Zhu, L.; Zeng, W.; Wang, J., Facile hydrothermal synthesis of 3D flower-like NiCo<sub>2</sub>O<sub>4</sub>/CeO<sub>2</sub> composite as effective oxygen reduction reaction catalyst. *J. Mater. Sci. : Mater. Electron.* **2020**, *31* (19), 16600–16608.
- Meléndez - González, P. C.; Sánchez - Castro, E.; Alonso - Lemus, I. L.; Pérez - Hernández, R.; Escobar - Morales, B.; Garay - Tapia, A. M.; Pech - Rodríguez, W. J.; Rodríguez - Varela, J., Bifunctional Pd - CeO<sub>2</sub> nanorods/C nanocatalyst with high electrochemical stability and catalytic activity for the ORR and EOR in alkaline media. *ChemistrySelect* **2020**, *5* (44), 14032–14040.
- Sun, S.; Xue, Y.; Wang, Q.; Huang, H.; Miao, H.; Liu, Z., Cerium ion intercalated MnO<sub>2</sub> nanospheres with high catalytic activity toward oxygen reduction reaction for aluminum-air batteries. *Electrochim. Acta* **2018**, *263*, 544–554.
- Kang, Y.; Wang, W.; Li, J.; Mi, Y.; Gong, H.; Lei, Z., 3D rose centifolia-like CeO<sub>2</sub> encapsulated with N-doped carbon as an enhanced electrocatalyst for Zn-air batteries. *J. Colloid Interface Sci.* **2020**, *578*, 796–804.
- Wang, X.; Xu, J.; Wu, Z.; Zhi, M.; Hong, Z.; Huang, F., Complexing - coprecipitation method to synthesize catalysts of cobalt, nitrogen - doped carbon, and CeO<sub>2</sub> nanosheets for highly efficient oxygen reduction. *ChemNanoMat* **2019**, *5* (6), 831–837.
- Sridharan, M.; Maiyalagan, T., Enhanced oxygen reduction activity of bimetallic Pd-Ag alloy-supported on mesoporous cerium oxide electrocatalysts in alkaline media. *New J. Chem.* **2021**, *45* (47), 22181–22192.
- Hota, I.; Debnath, A. K.; Muthe, K. P.; Varadwaj, K. S. K.; Parhi, P., A synergistic approach of Vulcan carbon and CeO<sub>2</sub> in their composite as an efficient oxygen reduction reaction catalyst. *J. Appl. Electrochem.* **2020**, *50* (10), 1069–1077.
- Sridharan, M.; Maiyalagan, T., Synergistically enhanced electrocatalytic activity of cerium oxide/manganese tungstate composite for oxygen reduction reaction. *J. Mater. Sci. : Mater. Electron.* **2022**, *33* (12), 9538–9548.
